# Supplementary material for: Rapid profiling of protein kinase inhibitors by quantitative proteomics
Source: Royal Society of Chemistry journal article supplement (doi:10.1039/c3md00315a), 2013-12-11
Supplement: c3md00315a.xlsx [file c3md00315a.xlsx]

## Sheet: Kinases
	Headers: (Probe Nr) (Competitor Concentration) (SILAC-label direction) (Replicate)
	log2 H/L ratios
	Intensities
	Nr of Unique Peptides/Peptides
Protein IDs	Protein names	Gene names	Proteins	4 10 µM forward A	4 10 µM reverse A	4 10 µM forward B	4 10 µM reverse B	4 25 µM forward A	4 25 µM reverse A	4 25 µM forward B	4 25 µM reverse B	4 50 µM forward A	4 50 µM reverse A	4 50 µM forward B	4 50 µM reverse B	1 10 µM forward A	1 10 µM reverse A	1 10 µM forward B	1 10 µM reverse B	1 25 µM forward A	1 25 µM reverse A	1 25 µM forward B	1 25 µM reverse B	1 50 µM forward A	1 50 µM reverse A	1 50 µM forward B	1 50 µM reverse B	5 50 µM forward A	5 50 µM reverse A	5 50 µM forward B	5 50 µM reverse B	6 50 µM forward A	6 50 µM reverse A	6 50 µM forward B	6 50 µM reverse B	7 50 µM forward A	7 50 µM reverse A	7 50 µM forward B	7 50 µM reverse B	8 50 µM forward A	8 50 µM reverse A	8 50 µM forward B	8 50 µM reverse B	4 10 µM forward A	4 10 µM reverse A	4 10 µM forward B	4 10 µM reverse B	4 25 µM forward A	4 25 µM reverse A
P00519-2;Q13688	Tyrosine-protein kinase ABL1	ABL1	2	0.742524	-0.731206	1.9863	-1.66041	2.7257	-3.1939	1.57255	-2.75906	3.53792	-4.42535	1.85571	-2.78369	3.01687	-2.3652	2.97089	-4.06234	1.39983	-2.86502	3.23285	-3.69285	3.23009	-2.12929	3.82914	-3.03884	2.02393	-0.853892	4.58868	-0.530385	3.12246	-2.15187	2.67227	-2.96151	1.73955	-1.35938	1.87974	-2.26257	2.26442	-2.14931	1.7589	-2.24298	32038000	76148000	47232000	44621000	23232000	41887000
P00519	Tyrosine-protein kinase ABL1	ABL1	1																			1.13534		2.80267																				0	0	0	0	0	0
P42684;P42684-3;P42684-2	Abelson tyrosine-protein kinase 2	ABL2	3	1.56876	-2.1136	2.99857	-3.06867	2.5435	-2.30265	2.26066	-3.59522	2.91898	-3.75191	2.52	-4.01686	2.72234	-2.71634	3.29585	-4.23373	3.07965	-2.86481	3.24375	-3.48583	3.53742	-1.41219	3.53232	-3.43874	1.88026	-3.36781	0.240131	-2.46124	4.34469	-2.86124	3.59287	-3.70985	2.51962	-2.75584	2.30696	-2.97007	2.58297	-2.84218	3.46074	-2.2863	69569000	192690000	125690000	176460000	79804000	40522000
Q86TW2;Q86TW2-2;G3V426;F8W9Q8	Uncharacterized aarF domain-containing protein kinase 1	ADCK1	4																																									0	69775	0	0	0	0
Q96D53;M0R001;Q96D53-2;M0R011;M0R3F7;M0R0L2;M0R362	Uncharacterized aarF domain-containing protein kinase 4	ADCK4	7																																									0	0	0	0	0	863630
P55263;P55263-3	Adenosine kinase	ADK	2														-0.0634242			0.160017						0.184852																		0	0	0	0	0	0
Q9BRR6;Q9BRR6-2;E7EQY8;Q9BRR6-3;Q9BRR6-4	ADP-dependent glucokinase	ADPGK	5																																									0	0	0	0	0	0
Q53H12;E9PC15;E9PG39	Acylglycerol kinase, mitochondrial	AGK	3																																									0	740180	0	0	976450	946260
P54819;F8W1A4;P54819-2;P54819-5;P54819-6;F8VY04	Adenylate kinase 2, mitochondrial	AK2	6																																									0	0	0	0	0	0
P10398	Serine/threonine-protein kinase A-Raf	ARAF	1																																									0	0	0	0	267940	0
Q13535;Q13535-3;Q13535-2;H0Y9K2;H0Y8Y6;H0Y8R8	Serine/threonine-protein kinase ATR	ATR	6																																									0	0	0	0	0	1127200
O14965;A3KFJ0;Q5QPD4;A3KFJ1;Q5QPD2;B4DXA6;Q5QPD1;A3KFJ2	Aurora kinase A	AURKA	8	-0.313477	0.367371																													0.135929	-0.199902	1.34295	-1.35089	1.44679	-1.426			0.117961	0.0803848	3855700	10901000	0	0	0	1813700
J9JID1;Q96GD4;B4DNM4;Q96GD4-2;J3KT86;J3QLN8;J3KTD6;J3QR41;Q96GD4-3;J3KRJ2;Q9UQB9;Q5Y191;Q9UQB9-3;Q9UQB9-2;J3KRF8;M0QYK8	Aurora kinase B	AURKB	16																																	1.96251	-2.17117	2.63171						0	0	0	0	0	0
P30530;P30530-2;M0R0W6	Tyrosine-protein kinase receptor UFO	AXL	3					-0.230093	-0.487277																																			0	0	0	0	1671000	2034500
Q9UIG0;Q9UIG0-2	Tyrosine-protein kinase BAZ1B	BAZ1B	2					0.032524			-0.232328	0.101247	-0.135554															-0.794132	-1.06175	-0.273866										-0.15938				0	0	0	842100	834960	0
P15056;H7C560	Serine/threonine-protein kinase B-raf	BRAF	2																																									0	0	0	661250	0	0
P27708;F8VPD4;H7C2E4;H7BZB3;H7C3Z5	CAD protein;Glutamine-dependent carbamoyl-phosphate synthase;Aspartate carbamoyltransferase;Dihydroorotase	CAD	5					-0.100345	-0.0187172			-0.34333	-0.141223																			0.137635	-0.627003	0.260026	0.456806				0.104873	0.121413	-0.127463			0	0	0	0	3292800	3152100
J3KPJ3;Q8N5S9;F8W9H1;Q8N5S9-2	Calcium/calmodulin-dependent protein kinase kinase 1	CAMKK1	4																																	1.27935	-0.978719	1.13021	-1.23671					0	0	0	0	0	0
O14936;H9KV37;O14936-2;F8W998;O14936-6;O14936-4;O14936-3;Q5JS74;O14936-5;Q5JS72;Q5JS79	Peripheral plasma membrane protein CASK	CASK	11															-0.573209																										0	0	0	0	0	729510
Q9Y5S2;H0YLY0	Serine/threonine-protein kinase MRCK beta	CDC42BPB	2																																									0	0	0	0	0	0
P06493;P06493-2;E5RIU6;K7ELV5	Cyclin-dependent kinase 1	CDK1	4																																					0.144438	0.402395	-0.0344263	0.0792927	0	0	0	0	1174400	998150
P21127;J3QR44;J3QKR5;Q9UQ88;P21127-2;P21127-3;Q9UQ88-2;Q5QPR3;Q9UQ88-3;J3QR29;P21127-8;Q9UQ88-4;P21127-9;Q5QPR4;J3KTL7;P21127-6;J3QL65;P21127-10;P21127-5;P21127-4;P21127-12;Q9UQ88-10;Q9UQ88-5;Q9UQ88-9;E7ESP2;J3KS35;G8JLH1;Q9UQ88-8;E9PFJ2;Q5QPQ9	Cyclin-dependent kinase 11B;Cyclin-dependent kinase 11A	CDK11B	30		2.46516			0.167872																																				0	4221200	0	0	1809600	957040
P24941;G3V5T9;P24941-2;E7ESI2;Q00526;G3V317;K7EJ83	Cyclin-dependent kinase 2	CDK2	7					0.0619835	-0.190652			-0.202804	-2.66036			4.97173																0.613815	-0.625244			0.123931	-0.107306	0.0603242	-0.373365	0.307545	0.139862	0.237197	-0.185507	20654000	31689000	3608900	3350700	8598400	6822000
P11802;F8VWX7;F8VTV8;F8VYH9;F8VZ51;B4DNF9;F8W1L8;F8VZZ0;F8VXD2;Q96BE9;F8VYY1;F8VZ13	Cyclin-dependent kinase 4	CDK4	12																																					0.201258	0.410124	0.546561	0.607958	0	0	0	0	0	0
P35790;P35790-2;E9PM06;H0YD02	Choline kinase alpha	CHKA	4	-0.222263	0.302407	0.017922				-0.896603	0.0230425			0.0791561														0.379843	-0.323028	-0.307751	-0.216652	-0.00303283	0.764856											6166300	11796000	2187400	0	0	0
O15111	Inhibitor of nuclear factor kappa-B kinase subunit alpha	CHUK	1																																									0	385180	0	0	0	0
O14578-4;O14578;H7BYJ3;O14578-3;O14578-2;H0YGG8;F5H4K4	Citron Rho-interacting kinase	CIT	7	-0.167329	0.102188		-0.503262	0.642655		0.506907	-0.731015	0.915712	-1.38564	0.258459	-2.55928																													2962200	6362500	1992600	3498300	627640	525390
P12277;G3V4N7;H0YJG0;G3V461	Creatine kinase B-type	CKB	4		-1.10243																													-1.33203				0.190678	1.53869		1.39955			0	1784800	0	0	0	0
P12532-2;P12532;F8WCN3;E9PCP8;C9JSQ1;C9JT96;C9J6W7;C9J8F6;C9J995	Creatine kinase U-type, mitochondrial	CKMT1A	9																																									0	0	0	0	0	0
P49761;P49761-1;G5E959;P49761-3	Dual specificity protein kinase CLK3	CLK3	4																			0.142348																						121740	221670	0	0	0	0
P30085;E9PGI8;Q5T0D2	UMP-CMP kinase	CMPK1	3																																					0.18916				0	0	0	0	0	0
O75131;E5RG68;E5RHZ0;E5RJ85;E5RG97;E5RFT7	Copine-3	CPNE3	6																																									0	0	0	0	1102100	0
P41240;H3BUM9;H3BN15;P42679-2;P42679;K7EQY5;P42679-3;K7ES68;K7ENL8	Tyrosine-protein kinase CSK	CSK	9	0.574828	-0.993264	1.78635	-1.49635	3.60395	-4.19379	1.99393	-2.78578	3.66937	-4.80233	3.00005	-4.30381	2.05162	-1.99361	0.828469	-0.698576	2.59567	-3.79562	1.21723	-1.04296	1.87208	-3.06178	3.78377	-1.73865	0.708408	-0.0117771	0.69207	-0.142704	0.543298	-0.388129	0.813196	-0.229399	0.607295	0.222928		0.219463	0.00158601	0.0287106	0.34153	0.347666	957860000	1602800000	1354400000	1434500000	329160000	358600000
P48729-2;P48729;Q71TU5;D6RGE5;E5RG27	Casein kinase I isoform alpha	CSNK1A1	5	0.661658																					0.279174	0.235237																		321850	253440	0	691230	0	0
Q5SRQ6;P67870;Q5SRQ3	Casein kinase II subunit beta	CSNK2B	3																																									0	0	0	0	0	0
Q3LXA3;H0YCY6;I3L252;E9PJG8	Bifunctional ATP-dependent dihydroxyacetone kinase/FAD-AMP lyase (cyclizing);ATP-dependent dihydroxyacetone kinase;FAD-AMP lyase (cyclizing)	DAK	4					-0.555036																																				0	0	0	0	1217600	568330
Q8WVC6;K7ESP4	Dephospho-CoA kinase domain-containing protein	DCAKD	2																																									0	0	0	0	1153800	1313400
D6RFG8;P27707;D6RCP9;D6RG38	Deoxycytidine kinase	DCK	4	-0.338378	0.429964	-0.170508	-0.12312	-0.246515	-0.626558	-0.386506	-0.278636	-0.738385	-0.521639	-0.267687	-0.373365													0.0717627	0.212507	0.0936954	0.158208	-0.137108	0.0775164	0.152768	0					-0.190454	0.279055	-0.429634	0.0807941	5059500	14027000	112480000	144230000	86992000	79334000
Q08345;Q08345-5;Q08345-6;Q08345-2;A2ABM8;Q6ZNR9;E7EPH4;H0Y9F4;E7EQ30;B8JJ50;Q08345-4;A2ABL2;E7EUP7;H0Y717;E7EPN2;E7ETI3;E7ERI6;A2ABL0;E7ESR9;E7ERN0;E7EVW6;E7EUD5;E7ETX3;E7ES06;E7EVT1;E7EN94;H0YAH6;E7ENJ2;E7EXB0;E7EX99;E7EQ23;D6RGW5;D6RBU7;D6RB82;D6RB35;D6R9C4	Epithelial discoidin domain-containing receptor 1	DDR1	36	1.22527	-1.56239	1.57478		1.90095				1.75416		1.50904		2.65246			-1.68492	3.3274		3.06674		3.03805		2.2784						2.62714	-1.74884	1.82008	-2.52011	2.09748		1.58241		2.59915	-2.02815			33391000	90785000	9751100	3499800	5375500	0
Q16832;H0Y570;Q5T244;Q5T245	Discoidin domain-containing receptor 2	DDR2	4	0.431569	-0.939704	2.21422	-1.2344	2.16501	-2.1883	2.1135	-2.83527	2.96652	-2.3148	2.76207	-2.91724	2.11876	-2.62487	3.45497	-3.11829	1.31707	-2.27739	3.05261	-1.38839	3.45996	-2.19667	1.71405	-2.63801	2.25069	-3.69557		-1.85298	3.23781	-2.73418	3.18778	-3.04335	1.59149	-2.68854	1.64229	-2.66383	1.23677	-1.45052	2.54612	-2.1879	16928000	31116000	65946000	77987000	2536100	5230200
P23919;H7BZ20;H7C312	Thymidylate kinase	DTYMK	3																																									0	0	0	0	0	0
P00533;E9PFD7;Q504U8;P00533-3;P00533-4;P00533-2;C9JYS6;H3BLT0	Epidermal growth factor receptor	EGFR	8	-0.363716	0.0684644	0.219834	-0.148785	0.507516	-0.525102	-0.0170959	-1.07085	0.912267	-1.13033	0.269273	-1.63048																													31841000	109600000	82398000	134640000	14286000	13312000
P19525;P19525-2	Interferon-induced, double-stranded RNA-activated protein kinase	EIF2AK2	2																		0.386038				0.285461																			0	0	0	1053800	0	0
Q9P2K8;Q9P2K8-2;H0YME5;Q9P2K8-3;H0YND8	Eukaryotic translation initiation factor 2-alpha kinase 4	EIF2AK4	5			0.345056	-0.391267			0.54962	-0.0975173			0.505586	-1.15978																													0	0	34600000	32834000	0	0
P29317	Ephrin type-A receptor 2	EPHA2	1	0.712112	-0.793282	1.8433	-2.25429	3.09337	-3.02339	1.52211	-3.47835	3.47093	-3.28097	2.59558	-3.81016	2.32452	-2.90498	2.50477	-3.09394	2.5372	-3.13049	2.75043	-2.95836	2.94216	-2.49981	2.87871	-2.22297		-1.01669			3.23009	-2.47065	3.38915	-3.95105					1.99248	-2.12614	2.23658	-2.89948	58682000	157250000	180690000	250960000	7411100	20063000
P54764;E9PG71;B7Z6Q8;F5GZZ5;C9JEM6;H7C1N8;C9JFX5;C9JIX8	Ephrin type-A receptor 4	EPHA4	8	0.610039	-0.79036															0.204767							-1.08293																	3079400	11084000	0	0	0	0
P54756;P54756-2;P54756-3;F8W9W0;F8VP57;P29320;C9JXA2	Ephrin type-A receptor 5	EPHA5	7	1.20902	-1.46566	2.63129	-2.56448	1.53556	-2.93104	2.5749	-3.92108	3.00106	-2.77458	2.52281	-3.3968	3.13542	-3.40651	3.04883	-3.71989	3.12285	-2.51301	3.34582	-3.98131	2.93872	-2.09974	3.21824	-3.15804					2.41303	-2.31574	2.46438	-2.86796					0.61372	-1.02028	1.16131	-1.10855	131540000	289420000	212890000	181730000	79412000	80302000
Q15375-4;Q15375-5;Q15375-3;J3KQG3;Q5JZY3;Q5JZY3-3;Q5JZY3-2;B4DXQ6;B4DXM2;Q06187;Q5JY90	Ephrin type-A receptor 7	EPHA7	11	0.140909	-0.383925	1.12678	-1.0591	2.33974	-2.35542	1.27584	-1.98154	2.8437	-3.30529	1.97328	-3.10544	3.17863	-1.26642	3.24913	-3.9902	2.49794	-3.45958	2.98317	-3.86708	3.49493	-0.931426	3.5612	-4.04823					2.48045	-2.03747	2.05707	-2.51961					0.884871	-0.865122	1.26009	-1.66168	255890000	571400000	488760000	635610000	138590000	107950000
Q15375;Q15375-2	Ephrin type-A receptor 7	EPHA7	2	0.0886844	-0.288893	0.933724	-0.866463			1.1818	-1.39392			1.86263	-2.52766																													7050300	15158000	12224000	16656000	0	0
P29323-3;P29323-2;P29323;B1AKC9;Q6NVW1	Ephrin type-B receptor 2	EPHB2	5	2.69619	-3.49945	3.6731	-3.76515	3.91762	-3.75988	3.22816	-3.56	3.85888	-3.93481	3.41224	-3.39579	3.63308	-3.1788	3.12499	-3.2133	3.03952	-3.69574	3.05384	-3.04466	3.59789	-2.19212	4.52876	-2.9453	1.01507	-0.492221	0.999928	-0.664974	2.72218	-2.45878	2.94968	-3.08119		-0.292475			0.623211	-0.129955	0.497536	-0.628698	181930000	476970000	267740000	359500000	155190000	58395000
P54753	Ephrin type-B receptor 3	EPHB3	1		-0.44975																																							155990	1382800	0	0	0	0
P54760;Q96L35	Ephrin type-B receptor 4	EPHB4	2	2.96079	-3.32135	3.37879	-3.07789	5.03444	-3.2576	3.14996	-3.09136	4.41657	-6.36563	2.97993	-3.09468	2.93064	-2.18698	3.35868	-2.80058	1.08658	-3.20783	3.66323	-2.53793	3.53319	-1.79922	3.05478	-2.85904				-1.07704	2.63919	-2.27488	2.85846	-2.66356					0.83455	-0.388356	0.992478	-0.661912	297510000	680440000	217410000	348260000	104030000	82174000
P16591;P16591-2;P16591-3;B4DDX7;D6RAF9;P07332;P07332-3;P07332-4;P07332-2;E7ENM8	Tyrosine-protein kinase Fer	FER	10	-0.168723	0.126973	0.524365	-0.440361	1.11882	-1.63527	0.265557	-1.13638	1.51561	-2.28518	0.899717	-1.84394			0.198494	0.107018			0.262794	0.394514	0.525467	-0.468591		0.344374	0.604071	-0.11677	0.180275	0.132774	0.116365	-0.376657	0.630499	0.0437644	0.612683	-0.0606531	0.556012	-0.222027	-0.128819		0.615793	0.134484	526690000	1010100000	664870000	778050000	266470000	249550000
P11362-21;J3KNT4;P11362;P11362-19;P11362-2;P11362-7;P11362-20;E7EU09;P11362-3;P11362-14;P11362-4;P11362-5;P11362-6;P11362-8;P11362-9;P11362-10;P11362-11;P11362-12;P11362-13;P11362-16;P11362-18;E9PNM3;E9PN14	Fibroblast growth factor receptor 1;Fibroblast growth factor receptor	FGFR1	23	0.710349	-0.349327	1.16749						1.18002		1.72478																														1208900	2005800	2189200	0	610360	0
P21802-11;P21802-16;P21802-3;P21802;P21802-18;P21802-10;P21802-5;P21802-9;P21802-7;P21802-6;P21802-12;P21802-17;P21802-13;P21802-2;P21802-8;P21802-23;E7EVR7;P21802-21;P21802-15;P21802-20;P21802-4;P21802-22;H7BXU9;H7C265	Fibroblast growth factor receptor 2;Fibroblast growth factor receptor	FGFR2	24		-0.435905					1.1236			-1.18902																															213300	1558900	711370	1042000	0	0
P09769;F5H3M4;Q5TGY6	Tyrosine-protein kinase Fgr	FGR	3																																									0	0	0	0	0	0
P06241	Tyrosine-protein kinase Fyn	FYN	1	0.170182	0.131194	0.968718	-0.350173			0.520246	-1.08865		-3.19945	1.14058	-1.86838	3.31101	-3.25058	2.54582	-3.44915	1.92231	-3.3261	2.26427	-3.0418	2.55127	-2.47963	2.74067	-3.09136	0.673285	-1.29584	0.787014	-1.11432	1.29484	-1.64287	1.31696	-1.96545	0.695103	-1.19146	0.71563	-1.31151	0.322159	-0.601562	0.473008	-0.600446	65458000	142040000	158500000	174950000	0	2960200
P06241-2;P06241-3;Q5R3A8;B3KPS6;E5RFS5;E5RIX5;E5RH71;E5RGT0;E5RFM0;E5RI25;E5RGM6;E5RHX7;E5RHF7;E5RFM4;E5RK23;E5RFM6;E5RJX7		FYN	17		0.344601																											1.69194												2101800	8574500	9394700	11499000	0	0
O14976;E9PGR2;D6RAW3;D6RE78;D6RC24;D6RAQ7;H0Y9M4;D6RF16;H0YA39	Cyclin-G-associated kinase	GAK	9	2.88037	-3.28884	3.10958	-3.53845	4.1482	-4.03474	2.93506	-4.05048	4.42378	-4.71558	2.92279	-4.30943	3.1354	-3.00694	2.40969	-2.32099	2.07793	-3.20836	2.86837	-2.82695	3.13169	-2.62487	3.33628	-2.49313	1.41186	-1.24818	1.69977	-0.851886	1.31028	-0.999452	1.50167	-0.712859					1.44228		1.28895	-1.10287	717660000	1421100000	1060700000	1156400000	189210000	254980000
B4E1G6;P51570;K7EII7	Galactokinase	GALK1	3																																									0	0	0	0	2078800	2074000
Q8TF76	Serine/threonine-protein kinase haspin	GSG2	1																																									0	0	588340	717340	0	0
P49841-2;P49841	Glycogen synthase kinase-3 beta	GSK3B	2																																									236170	502560	556520	0	0	0
J3KPD6;P08631;H0Y3C5;P08631-4;A8K4G3;P08631-2;P08631-3	Tyrosine-protein kinase HCK	HCK	7	-0.740384		1.2372													-2.65481														-2.09437	0.930926		0.831958	-0.966997	0.929867	-1.08317			0.233275	-0.610543	4802100	2042900	27690000	9720800	0	0
P52789;E9PB90	Hexokinase-2	HK2	2					0.346985	-0.110511			-0.547911																																0	0	0	0	3459500	4085500
P08069;C9J5X1;H0YNR0;H0YMJ5	Insulin-like growth factor 1 receptor;Insulin-like growth factor 1 receptor alpha chain;Insulin-like growth factor 1 receptor beta chain;Tyrosine-protein kinase receptor	IGF1R	4		0.359971	0.188401	0.213503			0.136323	-0.20307			-0.00209343	-0.470809																													179130	5496300	7664100	7407800	1366300	0
O14920;O14920-2;O14920-4;G3V105;B3KRB7	Inhibitor of nuclear factor kappa-B kinase subunit beta	IKBKB	5																																									0	0	0	0	0	0
Q13418;B7Z1I0;B7Z418;E9PNR4;E9PM54;E9PQ27;E9PQ52	Integrin-linked protein kinase	ILK	7													0.64321	-1.45036	0.686254	0.498455	1.29166	-1.69956	0.806778	0.391548	1.09085	-2.55089	2.24373	-0.075368																	0	0	0	0	0	0
P06213;P06213-2	Insulin receptor;Insulin receptor subunit alpha;Insulin receptor subunit beta	INSR	2																																									0	0	0	0	0	4524100
P23458	Tyrosine-protein kinase JAK1	JAK1	1	-0.25281	0.322851																											0.736562		1.71079	-0.935945									755350	6024300	0	0	0	0
E9PC47;P53667;P53667-2;P53667-4;P53667-3;C9JCP3	LIM domain kinase 1	LIMK1	6	-0.227489	0.024036	0.403486	-0.478788	0.696528	-0.804249	0.272023	-0.678603	0.944484	-1.69839	0.683023	-1.35347			1.06164			-1.05439																			1.27578	-0.600249	1.38951	-0.61288	23646000	60756000	7058400	6963700	12226000	11017000
P53671-3;P53671;B5MC51;P53671-2;E7EUC1	LIM domain kinase 2	LIMK2	5	0.0405417	0.0411028		-0.164383											0.176323		1.06599						1.43659																		4700000	13524000	331150	805950	0	0
P07948;E5RJ37	Tyrosine-protein kinase Lyn	LYN	2	0.20063	-0.105861	1.02913	-0.88961	3.20278	-3.28125	0.844145	-1.78881	3.52256	-4.05046	1.86924	-2.99792	3.5368	-3.69307	2.5615	-2.94142	2.66605	-3.41552	2.8132	-3.15521	3.19327	-2.77507	3.41724	-3.07461	0.998845	-1.09083	1.04642	-0.804778	2.29255	-2.00839	2.03506	-2.18975	1.03654	-1.13217	1.06846	-1.21387	0.977463	-0.648372	1.02191	-0.78991	564620000	917960000	755340000	799600000	220110000	218260000
P07948-2	Tyrosine-protein kinase Lyn	LYN	1					3.07205	-3.70991			3.46166	-4.25851					2.12559				2.70213										2.13307			-2.09456						-0.562005		-0.767241	10809000	30353000	4858100	5664100	48164000	42945000
Q02750;Q02750-2;P36507;G5E9C7;H3BRW9	Dual specificity mitogen-activated protein kinase kinase 1;Dual specificity mitogen-activated protein kinase kinase 2	MAP2K1	5																-0.0478006																									0	0	0	0	0	633910
P45985-2;P45985	Dual specificity mitogen-activated protein kinase kinase 4	MAP2K4	2																																					-1.0277				0	0	0	0	0	0
Q13163;Q13163-3;Q13163-2;Q13163-4;A6NK28;H7BZL1	Dual specificity mitogen-activated protein kinase kinase 5	MAP2K5	6	0.00115371	0.52667	0.394295	0.108357	0.522658	-1.58914	-0.0370883	-0.573724	0.416191	-1.19568	0.347779	-0.97534	0.762817		0.582652	0.331361			0.816067	0.192194		-0.210045	1.93176	-0.366355					1.30714	-1.17488	1.85965	-1.08684	1.77964	-1.17893	1.88827	-1.14369	1.54424	-1.46602	2.27849	-1.43425	6991900	17409000	15468000	12088000	7353100	9179900
P52564;P52564-2;K7EIW3;K7ELM6	Dual specificity mitogen-activated protein kinase kinase 6	MAP2K6	4																																									0	421990	0	0	1032300	859290
Q13233	Mitogen-activated protein kinase kinase kinase 1	MAP3K1	1	0.760689	-0.890974	1.86521	-1.41889	2.38181	-0.338104	1.28741	-2.40767	2.55993	-1.9155	1.10976	-2.92643	0.881508	-1.23212	1.16511		0.868766		1.05019	-1.15406			1.35078																		4918100	54287000	8512700	12277000	3340500	1701500
Q16584;B4DS76;E9PID4;H0YCF5;E9PRQ2;E9PLB1	Mitogen-activated protein kinase kinase kinase 11	MAP3K11	6	0.00317045	0.0848807	0.429428	-0.17958			0.703189	-0.453004			0.745797																														9622900	42435000	7134200	8165200	0	0
Q9Y2U5;F8W6K3	Mitogen-activated protein kinase kinase kinase 2	MAP3K2	2		0.397146												-1.31255	0.366252	0.037312	0.938098		0.488824	-0.144377	0.817951	-1.11672																			0	936570	0	0	71903	0
Q99759-2;J3QRB6;Q99759;J3KRN4;J3QS19	Mitogen-activated protein kinase kinase kinase 3	MAP3K3	5		1.00022																																							0	626480	0	0	0	0
O43318;O43318-2;Q9UG54;O43318-3;O43318-4	Mitogen-activated protein kinase kinase kinase 7	MAP3K7	5									0.858538																																0	0	0	0	1080400	1211000
Q12851;Q86VU3;C9JCU6;H7C208;F8WCP4;F2Z2B3	Mitogen-activated protein kinase kinase kinase kinase 2	MAP4K2	6	0.4654	-0.699091	0.889318	-1.05412	1.67491	-2.71444	1.16928	-1.84053	2.23554	-3.11304	1.59417	-2.51013																					1.9285	-1.83908	1.98532	-1.63639					28370000	61683000	116390000	79864000	27862000	19500000
Q8IVH8-3;Q8IVH8;Q8IVH8-2;F5H5A3;B4DSS3;H7C1A4;F8WAZ1;F8WBC3	Mitogen-activated protein kinase kinase kinase kinase 3	MAP4K3	8																																	2.52178	-2.59798	2.86146	-3.21223					0	0	0	0	0	0
E7EN19;G5E948;O95819-3;E7ESS2;O95819-5;O95819;O95819-2;H7C360;G3XAA2;O95819-4;E7ENQ1;C9J840;E7EX83;H7C0P6;H7C3Z6	Mitogen-activated protein kinase kinase kinase kinase 4	MAP4K4	15	-0.34474	-0.456286			0.834388	-1.15743			1.11237	-1.5592																															1899200	2842300	693000	0	4262500	10697000
Q9Y4K4;G3V4T8;G3V4Q4;G3V3V7;G3V5C6	Mitogen-activated protein kinase kinase kinase kinase 5	MAP4K5	5	0.116098	-0.00340876	0.473319	-0.424978	1.28647	-1.41581	0.703101	-0.940091	1.35332	-1.95904	0.296193	-0.652153	0.147567		0.68455	0.0048968	1.98994		1.00231	-0.451406	1.62021	-0.870994	1.96062	-1.08672									1.79098	-2.17469	1.89196	-1.81309					9309900	23710000	5296300	9931900	10583000	15985000
P28482;A8CZ64	Mitogen-activated protein kinase 1	MAPK1	2	-0.34183	0.60046	-0.102279	0.0558898	0.0298416	-0.471189	-0.317535	-0.304754	-0.276642	-0.577121	-0.396574	-0.510519																													76578000	175480000	114490000	136640000	24318000	22657000
Q15759;F8WDP4;B7Z630	Mitogen-activated protein kinase 11	MAPK11	3	0.307079	-0.250509	0.907121	-0.882544			0.725523	-1.75088	1.25199	-1.74251	1.48414	-2.17906														-1.7248		-0.518742	0.812211	-0.989908	1.10487	-0.999683					-0.356439		1.17185	-1.28764	12092000	21050000	24727000	28261000	73945	0
Q16539;Q16539-3;Q16539-4;B4E0K5	Mitogen-activated protein kinase 14	MAPK14	4	0.225152	-0.495064	1.17262	-0.994557	2.11956	-2.60938	1.03161	-1.77324	2.6421	-3.38902	1.76218	-2.68103	0.609282	-0.888274	0.675816	-0.606847	1.31719	-1.91115	1.09403	-1.03336	1.69893	-1.62082	2.37546	-1.68191	1.10983	-1.25729	1.38422	-0.841456	0.768502	-0.35345	1.00727	-0.900745					1.11623	-0.906927	1.62691	-1.34165	875610000	1558800000	1146000000	1360300000	213630000	277910000
Q16539-2;B5TY33;E7EX54;H7C4E2	Mitogen-activated protein kinase 14	MAPK14	4	0.458487	0.0551957			2.26819																				0.927517	-1.03608		-0.222162	0.791522		1.06323	-0.815225					-0.606628		1.38968	-1.13397	31881000	62641000	3763300	4619700	24855000	13705000
Q8TD08;Q8TD08-3;Q8TD08-2	Mitogen-activated protein kinase 15	MAPK15	3							0.29901																		-0.0151992	0.202637							0.423632								4152100	6871800	0	0	0	0
P27361;P27361-2;P27361-3;E9PQW4;E9PJF0;E9PBK7;B3KR49;E9PRH7;H0YEX6;H0YDH9;Q16659;P31152;K7EN18;K7ELV1	Mitogen-activated protein kinase 3	MAPK3	14	-0.31423	0.425567	-0.374711	-0.0630625			-0.53437	-0.411771			-0.362659	-0.584241																													9257700	24487000	10720000	21004000	0	0
P45983-3;P45983-4;Q308M2;A6NF29;C9J762;C9JWQ4		MAPK8	6	-0.387223	0.467697	0.191563	-0.2708	0.529271	-0.937713	-0.181935	-0.454763	0.604071	-1.0657	0.229834	-0.914249													0.839557	-0.291875	0.862987	-0.0685136	0.355693	-0.180332	0.776357	0.10742					0.339365	-0.191145	0.865444	0.10165	260290000	481480000	255800000	289470000	107390000	120730000
P45983-2;P45983	Mitogen-activated protein kinase 8	MAPK8	2												0.0997664																													512840	0	2604600	2356000	0	0
P45984;P45984-2;J3KNK1;P45984-5;D7R525;E5RJ57;D7R528;H7BYK0;D6RBH2	Mitogen-activated protein kinase 9	MAPK9	9	-0.15335	0.0896338	0.343351	-0.477121	0.787516	-1.65776	-0.162896	-0.951987	0.917164	-1.77537	0.235604	-1.51672													0.699463	-0.384377	0.76757	-0.142003	0.41565	-0.501075	1.03506	-0.311291	0.50782	0.196229	0.453122	-0.0688919	0.62499	-0.574347	1.15127	-0.547679	483880000	1032300000	749800000	949610000	147300000	333540000
Q7KZI7;Q7KZI7-8;Q7KZI7-11;Q7KZI7-6;Q7KZI7-3;Q7KZI7-12;Q7KZI7-9;Q7KZI7-4;Q7KZI7-5;Q7KZI7-2;Q7KZI7-7;Q7KZI7-10;E9PC69;Q7KZI7-14;Q7KZI7-16;Q7KZI7-15;E7ETY4;Q7KZI7-13;Q9P0L2;Q9P0L2-3;Q9P0L2-2;F5H4F6;Q96L34;Q96L34-2;A2SY06;F5H6N2;K7EKG8;K7EK17	Serine/threonine-protein kinase MARK2;Serine/threonine-protein kinase MARK1	MARK2	28									-3.93847																																0	0	0	0	0	0
P27448;P27448-4;P27448-3;J3KNR0;P27448-2;P27448-6;P27448-8;P27448-7;H0YNV4;H0YIY6;H0YKP9;H0YKJ3	MAP/microtubule affinity-regulating kinase 3	MARK3	12			0.439464	-1.2396			0.710085				0.947778	-0.801456																0.774587													0	0	4232400	9326200	0	637970
Q12866;E9PHX8;H7C3L9	Tyrosine-protein kinase Mer	MERTK	3																																									0	0	0	0	0	0
P08581;P08581-2;P08581-3;B4DPY6;H7C174;C9JVH4;C9JKM5;H7C130	Hepatocyte growth factor receptor	MET	8	-0.0487554	-0.0880247				0.0199154			-0.133891	-0.61885																			0.430392	0.0835197	0.0618453	-0.301782	2.07245	-2.51787	2.09532	-2.49973	0.323658	-0.0906954	0.395172	-0.400301	3405100	10459000	0	0	1215400	1637500
Q8N4C8;Q8N4C8-4;Q8N4C8-3;Q8N4C8-2;Q8N4C8-5	Misshapen-like kinase 1	MINK1	5																																									0	48020	0	0	0	0
Q8NB16;Q8NB16-2;I3L4A6;I3L2T9;I3L2U3;I3L4Z5	Mixed lineage kinase domain-like protein	MLKL	6													-0.213638	0.0522768	0.304745	0.562474		-0.0418181	0.32435	0.476019	0.180784	-0.113973	0.177216	0.354226																	0	0	0	0	0	0
Q9NYL2	Mitogen-activated protein kinase kinase kinase MLT	MLTK	1	0.731009	-0.997866	1.99288	-2.07084	2.53506	-3.21384	2.11183	-3.88995	2.9897	-2.81117	2.81213	-4.87121	1.89499	-2.14484	1.13159	-0.906764	2.62042	-3.25539	1.60687	-1.31359	2.25568	-2.97245	3.75521	-2.16475	2.04729	-2.12803	2.1853	-1.764	3.76638	-3.01999	3.94935	-3.43439	2.17053	-1.95792	2.23612	-1.99286	3.43029	-3.15444	3.56852	-2.6246	334980000	708370000	602560000	635460000	70708000	61720000
B4E0Y9;Q9P289;Q8NBY1;Q9P289-3;Q9P289-2	Serine/threonine-protein kinase MST4	MST4	5																																									0	0	0	0	2568300	1975800
P42345;B1AKP8	Serine/threonine-protein kinase mTOR	MTOR	2					-0.0286018	-0.723539																																	0.0308304		0	0	0	0	7329000	3828800
Q15746;Q15746-6;Q15746-3;Q15746-2;Q15746-5;Q15746-4;Q15746-7;B4DUE3;D6R9C2	Myosin light chain kinase, smooth muscle;Myosin light chain kinase, smooth muscle, deglutamylated form	MYLK	9																																		0.18053							56573000	110560000	92709000	125940000	0	0
P51955;P51955-4;B4DZU0;P51955-2;P51955-3;P51617;D3YTB5;P51617-3;P51617-2;P51617-4;H7C224;H7C2I6	Serine/threonine-protein kinase Nek2	NEK2	12	-0.31651																																0.567253	-0.73699	0.619366	-0.889049					783870	0	0	0	0	0
Q8TDX7;Q8TDX7-2;F8WAG2	Serine/threonine-protein kinase Nek7	NEK7	3																																									0	0	0	0	0	612190
Q9UBE8;H0YD75	Serine/threonine-protein kinase NLK	NLK	2	0.568519																																								404390	465040	0	0	0	0
P15531-2;P15531	Nucleoside diphosphate kinase A	NME1	2																																			-1.19152			1.74494			199320	286230	0	0	937780	0
Q32Q12;P22392-2;P22392;J3KPD9;E7ERL0;F6XY72;O60361;E5RHP0;C9K028	Nucleoside diphosphate kinase;Nucleoside diphosphate kinase B	NME1-NME2	9																																									0	127560	0	0	0	0
Q13177;H7C1X3;O75914-3;O75914-4;O75914;O75914-2;Q13153-2;Q13153;B3KNX7;E9PM17;H0YCG5;B1AKS5	Serine/threonine-protein kinase PAK 2;PAK-2p27;PAK-2p34	PAK2	12																																	1.70319	-1.26444	1.42583	-1.62069					0	0	0	0	0	0
B4DX68;Q96KB5	Lymphokine-activated killer T-cell-originated protein kinase	PBK	2																																									0	0	0	0	261950	172250
P09619	Platelet-derived growth factor receptor beta	PDGFRB	1																			1.4298																						0	163610	0	0	0	0
O00764;O00764-2;F2Z2Y4;O00764-3;A8MV33	Pyridoxal kinase	PDXK	5																													-0.100824	-0.513831	0.576764	-0.384056		0.141694	0.0060466	0.156267					0	0	0	0	0	0
Q01813;Q01813-2;B1APP6;B1APP8;H0Y3Y3	6-phosphofructokinase type C	PFKP	5																																									0	0	0	0	0	0
P00558;B7Z7A9;E7ERH5;P07205	Phosphoglycerate kinase 1;Phosphoglycerate kinase	PGK1	4		-1.14813			-0.127652				-1.33745																						-2.00654	-0.221018	-1.44167		0.0812032	1.38538		2.16713			0	4328200	0	0	1831200	0
Q99570;D6RJ98	Phosphoinositide 3-kinase regulatory subunit 4	PIK3R4	2										0.577828																															0	0	0	0	0	0
Q8TBX8;Q8TBX8-3;Q8TBX8-2;H0YIJ6	Phosphatidylinositol 5-phosphate 4-kinase type-2 gamma	PIP4K2C	4																																		-1.41777	1.31609	-1.47417					0	0	0	0	0	0
Q99755;A6PW57;Q99755-3;Q99755-4;Q99755-2	Phosphatidylinositol 4-phosphate 5-kinase type-1 alpha	PIP5K1A	5																																									0	0	0	0	0	0
P14618;P14618-2;P14618-3;H3BTN5;Q504U3;H3BQ34;H3BSU3;H3BTJ2;H3BUW1;H3BT25;H3BU13;H3BQZ3;H3BN34	Pyruvate kinase isozymes M1/M2;Pyruvate kinase	PKM2	13	0.0413831	-1.36956			-0.365388	-0.563987			-1.53948	-0.343147			-2.11466		-1.997	0.271187		0.227741	-1.71895		-1.50173			0.840443					-1.32717		-3.05361	0.0629506	-2.37183	0.558562	0.0625362	1.07895	-0.546899	0.278342	-1.40312	0.413161	6098400	13942000	0	713980	49117000	34541000
Q99640;B4DZM6;Q99640-2;I3L3P0;I3L4K3;I3L1H7;I3L4Y0	Membrane-associated tyrosine- and threonine-specific cdc2-inhibitory kinase	PKMYT1	7															-0.129844									-3.20916																	0	0	0	0	0	0
Q6P5Z2	Serine/threonine-protein kinase N3	PKN3	1																																									0	0	0	0	0	635090
Q13131-2;Q13131;Q96E92	5-AMP-activated protein kinase catalytic subunit alpha-1	PRKAA1	3	-0.216015	0.287472		0.100574	0.0936954		-0.284493	-0.466855	-0.176006		-0.327023	-0.930325																					0.196481								3316100	8669100	1190400	1318300	14574000	5813700
P54646	5-AMP-activated protein kinase catalytic subunit alpha-2	PRKAA2	1																																									0	0	0	0	0	0
P22694-2;P22694-9;C9JK39;P22694-6;P22694-7;P22694-5;P17612;P22694;P17612-2;P22694-3;P22694-4;P22694-10;P22612;K7ERP6	cAMP-dependent protein kinase catalytic subunit alpha;cAMP-dependent protein kinase catalytic subunit beta;cAMP-dependent protein kinase catalytic subunit gamma	PRKACB	14						-0.124818			-0.506189																																0	0	0	0	608810	1284800
Q8N7V9;P54619;B4DDT7;F8VYY9;F8W9D1;H0YHF8;F8VVA3;F8VSL2;Q9UGJ0;Q9UGJ0-3;E9PGP6;G8JLM0;Q9UGJ0-2;F8VPF5;F8VU55;F8VRY2;F8VSH3	5-AMP-activated protein kinase subunit gamma-1	PRKAG1	17	-0.111757	0.213378			-0.109779	-0.730009		-0.6539	-0.220497	-0.886833		-1.15521																													1339400	1805100	1221200	1093600	19709000	11390000
P41743	Protein kinase C iota type	PRKCI	1															-0.690474					-0.207111					0.135009																0	0	0	0	1090900	1597400
P78527;P78527-2;E7EUY0;F5GX40;H0YG84	DNA-dependent protein kinase catalytic subunit	PRKDC	5	-0.124346	-0.450636	-0.136807	0.0521377	-0.229196	-0.556181	-0.181444	-0.300982	-0.420395	-0.396024	-0.126218	-0.596187	-0.814616		0.258097	-0.014587	0.0103502	-0.268852	0.538141	0.60483	0.591488	0.334339	0.336169	0.0238941	-0.17656	0.168899	0.0439044	0.157561	-0.310361	-0.433487	0.185232	0.0150693	0.122871	0.415542	-0.0173002	0.0836559	-0.0248688	-0.0843032	0.138945	0.0104934	13674000	50580000	24252000	23641000	150880000	151080000
Q13523;F5H2U2;H0YDJ3;H0YEC8	Serine/threonine-protein kinase PRP4 homolog	PRPF4B	4	-0.190289	0.430607													-0.13397					-0.141955		-0.100298																			1490000	3306900	0	0	0	0
P11908-2;P11908;P60891;B4DNL6;B1ALA9;H7C540;H7C518	Ribose-phosphate pyrophosphokinase 2;Ribose-phosphate pyrophosphokinase 1;Ribose-phosphate pyrophosphokinase	PRPS2	7																																						1.14516			0	0	0	0	0	0
E7ESA6;Q05397;H0YBP1;Q8IYN9;J3QT16;Q05397-5;Q05397-2;H0YBZ1;H0YB16;Q8N9D7;E9PEI4;Q05397-3;Q05397-4;B4DWJ1;Q05397-6;H0YB99;E5RHD8;E5RGA6;E5RFW9;E5RJP0;E5RI72;E5RG66;E5RH01;E5RI03;H0YB33;E5RH48;E5RJI4;E5RG54;E5RIK4;E5RG86;E5RI29;H0YAS0;E5RH08;E5RG80;E5RJQ2;E5RGP1;E5RIR5	Focal adhesion kinase 1	PTK2	37	0.154454	-0.165127	0.657183	-0.746979	1.21735	-2.07388	0.919302	-1.42221	1.52075	-2.56935	1.48579	-2.25656																													150490000	317860000	444770000	529440000	119680000	77372000
Q14289;Q14289-2;E9PBI4;C9JHV9;E5RJ77;H0YB74;E5RK84;E5RHL2	Protein-tyrosine kinase 2-beta	PTK2B	8	0.113567	-0.266698	0.563451	-0.708067	1.04984	-1.98919	0.667302	-1.47125	1.64376	-2.26451	1.00454	-2.17156																													22208000	52356000	54238000	56182000	13119000	18482000
Q13882;Q13882-2	Protein-tyrosine kinase 6	PTK6	2	-0.0930325	-0.0950343	0.753348	-1.05164			0.719928	-1.51161	2.0091		1.40261	-3.03967	1.03661		0.808509		1.28469	-2.53684	0.919912	-0.00589823	1.61174	-1.28346	2.09346	-0.748578				-1.63178	2.09552	-0.851599	1.47041	-0.968944									15958000	42996000	14233000	19528000	3146100	3067000
Q13546;Q13546-2	Receptor-interacting serine/threonine-protein kinase 1	RIPK1	2	0.195221	-0.259116	0.552771	-0.886513	1.44642	-1.58182	0.841893	-1.735	1.87105	-2.35277	1.44694	-2.57441																	2.78768	-2.55894	3.22598	-3.08216					3.00576	-3.01112	3.64939	-3.65755	96555000	195210000	212930000	283810000	33966000	37782000
O43353;O43353-2;E5RGK6;E7ERW9	Receptor-interacting serine/threonine-protein kinase 2	RIPK2	4	1.01614	-1.36755	2.26379	-1.93457	3.72672	-3.9751	1.89367	-3.05026	4.04256	-5.19158	2.1141	-2.70802	2.68729	-3.22203	2.13314	-2.57656	2.99028	-4.04237	2.734	-3.03694	3.32423	-2.2111	3.26057	-3.39355	1.89883	-2.14829	2.22401	-1.7555	2.81977	-2.34916	3.15207	-3.10135	1.72321	-1.77078	1.86892	-1.98285	2.80591	-3.00196	3.18123	-2.27977	211250000	454200000	165930000	251310000	67498000	66852000
Q15418-2;Q15418;E9PGT3;E9PRI4;Q15418-3;E9PMM7;Q5SVM7	Ribosomal protein S6 kinase alpha-1;Ribosomal protein S6 kinase	RPS6KA1	7		0.361881																																							277390	1223700	0	0	0	0
P51812;B7ZB17;B4DG22;F5GYC4;B1AXG1;F2Z2J1;Q15349-2;Q15349-3;Q15349;B7ZL90;Q9UK32;B7Z3B5;B1AXG2;D6R910;D6RHW7;E9PAN7;D6RE03;D6RA62;Q5TI62;Q5SVM6;F8WAQ9;O15021;J3QT34;E7EWQ5;O15021-1;O15021-3;O15021-2;Q96GX5;Q96GX5-3;Q96GX5-2	Ribosomal protein S6 kinase alpha-3	RPS6KA3	30	-0.272716	0.450697	-0.0518626	-0.0684531	-0.0068256	-0.184818	-0.364385	-0.271009	-0.073788	-0.439363	-0.651382	-0.418196																													9022100	28036000	16945000	26053000	13056000	15160000
P57059;Q9H0K1	Serine/threonine-protein kinase SIK1	SIK1	2	0.634872	-0.000663834	0.689568				-1.01336		1.58121	-2.48697	-0.304968	-1.77729								-1.69904				-0.853006																	805210	3851700	6437200	891300	0	0
Q9H2G2;Q9H2G2-2	STE20-like serine/threonine-protein kinase	SLK	2		-1.27202							0.794104	-1.57738																															0	449470	0	282540	453440	497810
P12931-2;P12931;Q04912;Q04912-2;P42685;Q9H3Y6;B4DY49;H7C074;H7C3Z8	Proto-oncogene tyrosine-protein kinase Src	SRC	9	0.164786	-0.0746233	0.983167	-0.819801	2.51177	-3.18456	0.813278	-1.57175	3.02135	-3.11441	1.67758	-2.67457	2.43624	-3.83298	2.59555	-2.41219	1.4845	-3.45368	3.04049	-2.66018	2.78833	-2.426	2.55842	-1.87165	0.889941	-0.437526	0.889474	-0.208828	1.31226	-1.38749	1.66435	-0.844458	1.19925	-0.490821	1.12961	-0.563945	0.228357	-0.274651	0.892741	0	167280000	344350000	197370000	278890000	42631000	47335000
Q96SB4-3;H3BLV9;Q96SB4;B4DS61;Q5R363;D6RBM8;E7ETV6;Q9UPE1;Q9UPE1-4;A8MPY5;Q9UPE1-3;A8MPP7;Q9UPE1-2;D6RBF8;H7C2I2	SRSF protein kinase 1	SRPK1	15			-0.126628	-0.0774063	0.098689	0.0801119	0.114234	0.0593554	0.232661	0.0651587	-0.0731959	-0.01249	-0.0183519					0.132906				0.0344974	-0.0651137		0.214747	-0.0292641	-0.00911769	-0.0471148	0.214747												0	0	18269000	21365000	6629000	6438800
P78362-2;P78362;H7C5L6;H7C521;C9JWF7;C9J2M4;F8WBW4	SRSF protein kinase 2;SRSF protein kinase 2 N-terminal;SRSF protein kinase 2 C-terminal	SRPK2	7			-0.0139459	-0.113879			-0.166713	-0.0780305		0.180912	0.0263043	-0.192843	0.261471					0.111298				-0.120169	-0.046936		0.123136	-0.19904	0.121148	-0.0916635	0.0862402					-0.709788			0.300182				0	0	11768000	17499000	0	226580
O94804	Serine/threonine-protein kinase 10	STK10	1	0.371169	1.68975																																							218740	2589100	0	0	395100	0
Q9Y6E0-2;B4DR80;Q9Y6E0;H0Y630;Q5JV98	Serine/threonine-protein kinase 24;Serine/threonine-protein kinase 24 36 kDa subunit;Serine/threonine-protein kinase 24 12 kDa subunit	STK24	5						-1.70741																																			0	0	0	0	2507200	6987500
Q13043;Q13043-2;F5H5B4;B3KYA7;Q13188;E5RFQ9;Q8NBU1;E5RIM6	Serine/threonine-protein kinase 4;Serine/threonine-protein kinase 4 37kDa subunit;Serine/threonine-protein kinase 4 18kDa subunit;Serine/threonine-protein kinase 3;Serine/threonine-protein kinase 3 36kDa subunit;Serine/threonine-protein kinase 3 20kDa subunit	STK4	8																																									0	0	0	0	367120	0
Q9UL54;Q9UL54-4;Q9UL54-2;Q9UL54-3	Serine/threonine-protein kinase TAO2	TAOK2	4	0.765789	-0.209111	0.946431	-1.01269		-0.775861	0.172487			-1.91555	0.199751	-1.82143																													952880	2913100	11106000	7828000	2449400	2843100
Q9H2K8;G3V1Q8;H0YF68;F5H5E0;F5GWV8;F5H5C7	Serine/threonine-protein kinase TAO3	TAOK3	6	0.516721	0.172487							0.527371																																478030	2541100	0	0	0	1376500
Q9UHD2;F5H1A3;F5H206;F5GZI4	Serine/threonine-protein kinase TBK1	TBK1	4																																	1.22126	-0.992977	1.28641	-1.12425					0	0	0	0	0	0
P42680;D6RDU7;D6RB05;D6RB75	Tyrosine-protein kinase Tec	TEC	4	-0.131724	0.30147	-0.000620475						1.08352	-0.686011		-0.642865	0.882604		0.861003	-0.575594	0.705226	-1.13239	1.24659	-0.94511	1.53675	-1.57514	2.07782	-1.63151																	1868700	19208000	1998800	867450	1772600	3343700
Q15569	Dual specificity testis-specific protein kinase 1	TESK1	1																																									0	0	0	0	0	0
Q96S53;Q96S53-2;Q96S53-3;F5GWP9;B4DYL6	Dual specificity testis-specific protein kinase 2	TESK2	5			1.29484					-1.44867			1.97358				1.5102									-2.06564																	0	475770	1628100	1100800	0	0
P36897-2;P36897;B4DY26;P36897-3	TGF-beta receptor type-1	TGFBR1	4																																									0	0	0	0	0	0
Q03167;Q03167-2	Transforming growth factor beta receptor type 3	TGFBR3	2																										0.209017															0	0	0	0	0	0
Q13470-2;Q13470;I3L334	Non-receptor tyrosine-protein kinase TNK1	TNK1	3	0.410884	-0.402512	1.18777	-0.888888	1.8303		1.45922	-1.72671	2.16208		1.96805	-2.6337															0.659559		1.41641		1.32129	-0.489423	2.10538	-2.12155	2.3417	-2.1715	1.52462	-1.55355	2.04271	-1.27869	98278000	222200000	45678000	63994000	389970	157620
Q07912-3;C9J1X3;Q07912;Q07912-2;H7BZZ3;H7BZM8;H7C412;C9JIR5;H7C343;C9JDG3;F8WER3	Activated CDC42 kinase 1	TNK2	11	0.406972	-0.601124	1.27328	-0.999971	1.86865	-1.8248	1.36424	-1.67793		-2.33512	1.75869	-1.88897	2.96984		2.11637	-2.0953		-1.85058	2.57405	-2.52941	3.21258	-2.2123	3.00518	-3.08424																	21747000	58964000	25603000	21121000	6162200	4882200
O75962;O75962-4;O75962-2;O75962-5;E7EPJ7;E7EWP2;F5H228;J3QSW6;O60229;H7BXZ5;O60229-2;C9IZQ6;O60229-3	Triple functional domain protein;Kalirin	TRIO	13																																									0	0	0	0	24209	0
P29597;E9PM19;K7EJR6;E9PPF2;E9PQE9;E9PQL2	Non-receptor tyrosine-protein kinase TYK2;Tyrosine-protein kinase	TYK2	6																				-0.303401																					0	0	0	0	0	0
Q96C45	Serine/threonine-protein kinase ULK4	ULK4	1	1.08052																																								5367700	0	0	0	0	0
Q86Y07;Q86Y07-3;Q86Y07-2;Q86Y07-5;Q86Y07-4	Serine/threonine-protein kinase VRK2	VRK2	5																																									0	0	0	0	83145	78252
J3QRU1;P07947;P06239-3;Q573B4;P06239	Tyrosine-protein kinase Yes	YES1	5	0.699907	-0.966066	1.52195	-1.50635	3.98313	-4.27965	1.48026	-2.97858	4.50849	-5.00291	2.65272	-4.58073	4.14853	-4.30772	3.18763	-3.67098	3.00599	-3.72566	3.11872	-3.73797	3.76065	-3.18089	5.00751	-3.19179	0.874915	-0.477081	0.740453	-0.581022	1.53381	-1.33486	1.47571	-1.34593	1.43178	-1.53479	1.45796	-1.50533	0.280719	-0.333262	0.568227	-0.155229	520580000	1049900000	629800000	775320000	223540000	273610000
Q9NYL2-2;B4DQ47;Q9NYL2-3;C9J3F7		ZAK	4	0.929185	-1.38097	2.33428	-2.16676	3.91227	-4.35567	3.03291	-3.58213	3.98968	-4.31485	3.8528	-4.55229	1.72613	-1.66795	1.00101	-0.623487	2.4105	-3.30729	1.37851	-1.01485	2.22953	-1.81223	2.81736	-1.80657	1.95877	-1.79466	2.09845	-1.15332	4.62883	-3.67194	4.32077	-3.10333	2.05603	-1.90833	2.12935	-1.85215	4.89951	-3.83197	4.09694	-3.30159	100940000	281130000	120480000	100030000	49594000	40468000
[truncated: 74 more columns]
