# Supplementary material for: Rapid profiling of protein kinase inhibitors by quantitative proteomics
Source: Royal Society of Chemistry journal article supplement (doi:10.1039/c3md00315a), 2013-12-11
Supplement: c3md00315a_2.xlsx [file c3md00315a_2.xlsx]

## Sheet: Probes 3-8
	Competitor Nr and concentration				*: Protein hit could not be quantified in one of the four quadruplicate experiments
	Average log2 H/L ratios with standard deviations				**: One outliying log2 H/L ratio value raised the p-value over the <0.05 threshold
	Heat Map: Combined sequence coverage from each quadruplicate experiment				p-Values calculated from the four log2 H/L ratios of a quadruplicate experiment according to Student´s T-Test
Protein Kinases							Seq. Coverage %						p-Values
Gene Names	1 50 µM	4 50 µM	6 50 µM	7 50 µM	8 50 µM	5 50 µM	1 50 µM	4 50 µM	6 50 µM	7 50 µM	8 50 µM	5 50 µM	1 50 µM	4 50 µM	6 50 µM	7 50 µM	8 50 µM	5 50 µM
ABL1	3.06 ±0.61	3.15 ±0.95	2.73 ±0.37	1.81 ±0.32	2.1 ±0.2		45.5	39.8	46.4	19.8	28.6		0.0107258	0.00252813	0.00126709	0.000352569	0.00153444
ABL2	2.98 ±0.91	3.3 ±0.61	3.63 ±0.53	2.64 ±0.25	2.79 ±0.43	1.99 ±1.14**	53.4	42.3	54.1	28.7	38.7	19.9	0.00321402	0.0103824	0.00103022	0.00232482	0.000381663	**0.118333325491891
AURKA				1.39 ±0.05						74.7						1.47389e-05
AURKB				2.26 ±0.28*						37.1						na*
CAMKK1				1.16 ±0.12						18.2						0.000423427
CSK	2.61 ±0.85	3.94 ±0.68					84.2	82.2					0.0129014	0.00207205
DDR1			2.18 ±0.4						22.3						0.00247139
DDR2	2.5 ±0.64	2.74 ±0.26	3.05 ±0.2	2.15 ±0.53	1.86 ±0.53	2.6 ±0.79*	27.6	29	33.1	23.9	3.3	18.7	0.00664908	0.000346123	0.0001124	0.00595073	0.0091237
EPHA2	2.64 ±0.29	2.98 ±0.91	3.26 ±0.53		2.31 ±0.35		44.2	47.4	56.4		47.7		0.000570368	0.00101571	0.00175465		0.00141889
EPHA5	2.85 ±0.45	2.92 ±0.32	2.52 ±0.21		0.98 ±0.22		32.8	39.2	4.2		3.7		0.00159007	0.000554798	0.000246706		0.00429341
EPHA7	3.01 ±1.22	2.81 ±0.51	2.27 ±0.23		1.17 ±0.33		5.9	62.5	16.3		4.8		0.0234629	0.0024256	0.000416869		0.00840516
EPHB2	3.32 ±0.86	3.65 ±0.25	2.8 ±0.24			0.79 ±0.22	46	49.8	51.1			15.1	0.00682102	0.00013225	0.000253098			0.0086158
EPHB4	2.81 ±0.63	4.21 ±1.36	2.61 ±0.21		0.72 ±0.22		38.2	48.4	5.2		28.6	8.2	0.0045815	0.0127752	0.00022213		0.0114674
FER		1.64 ±0.51						65.7						0.011204
FYN	2.72 ±0.24	2.07 ±0.85*	1.56 ±0.27	0.98 ±0.28		0.97 ±0.25	5.7	61.5	58.7	45.6		27.7	0.000279208	na*	0.0022406	0.00872694		0.0067148
GAK	2.9 ±0.35	4.09 ±0.69	1.13 ±0.3		1.28 ±0.14*	1.3 ±0.31	57.8	63.5	11.4		14.6	1.1	0.000725261	0.00197963	0.0073463		na*	0.00517898
HCK				0.95 ±0.09						3.6						0.000352493
ILK	1.49 ±0.98**						58.4						**0.0783572744776252
JAK1			1.13 ±0.42*						5.6						na*
LIMK1					0.97 ±0.37						19.1						0.019341
LYN	3.12 ±0.23	3.11 ±0.81	2.13 ±0.12	1.11 ±0.07	0.86 ±0.15	0.99 ±0.11	75.8	76.6	8.1	64.3	73.8	5.2	0.000173404	0.00686268	6.80968e-05	9.54566e-05	0.00216643	0.000568542
MAP2K5	0.84 ±0.78*		1.36 ±0.3	1.5 ±0.34	1.68 ±0.35		18.3		3.6	5.4	34.2		na*		0.00435157	0.00462509	0.00356462
MAP3K1		2.13 ±0.69						13.9						0.0128451
MAP4K2		2.36 ±0.55		1.85 ±0.13				51.8		2.1				0.00491173		0.000155537
MAP4K3				2.8 ±0.27						3						0.000377619
MAP4K5	1.38 ±0.43			1.92 ±0.15			31.2			25.2			0.0113834			0.000214143
MAPK11		1.66 ±0.34	0.98 ±0.11		0.94 ±0.41*			33	35.7		28.6			0.00356548	0.000521683		na*
MAPK14	1.84 ±0.31	2.62 ±0.58	0.89 ±0.12		1.25 ±0.27	1.15 ±0.2	73.1	85.3	86.1		75	84.4	0.00191342	0.00428797	0.0131958		0.00395666	0.00222693
MAPK9			0.57 ±0.28		0.72 ±0.25	0.5 ±0.25			65.3		67.5	5.2			0.0391877		0.0148792	0.0414518
MET				2.3 ±0.21						55.1						0.000333877
MLTK	2.79 ±0.64	3.37 ±0.87	3.54 ±0.35	2.09 ±0.12	3.19 ±0.36	2.03 ±0.16	64.2	49.5	64.2	53.5	62.4	47.6	0.00484388	0.00673271	0.000417356	7.41705e-05	0.000604275	0.000213085
PAK2				1.5 ±0.17						18.7						0.000613435
PIP4K2C				1.4 ±0.07*						1.2						na*
PTK2		1.96 ±0.47						5.5						0.0054288
PTK2B		1.77 ±0.5						42.2						0.00880234
PTK6	1.43 ±0.49	2.15 ±0.68*	1.35 ±0.49				11.3	21.7	28.4					na*	0.0176902
RIPK1		2.06 ±0.44	2.91 ±0.26		3.33 ±0.32			52.6	66.6		66.3			0.00382132	0.000294164		0.000381012
RIPK2	3.05 ±0.49	3.51 ±1.19	2.86 ±0.32	1.84 ±0.1	2.82 ±0.34	2.01 ±0.19	7.2	65.4	76.9	66.7	77.2	7.7	0.0147854	0.0145982	0.000580809	6.73223e-05	0.000717293	0.000347671
SIK1		1.54 ±0.79**						8						**0.102708383711548
SRC	2.41 ±0.34	2.62 ±0.57	1.3 ±0.29	0.85 ±0.32		0.61 ±0.29	58.5	58.7	6.7	5.7		26.8	0.00166137	0.00411153	0.00464598	0.0196425		0.0376665
TEC	1.71 ±0.22						24.9						0.000865995
TNK1		2.25 ±0.28*	1.08 ±0.42*	2.19 ±0.09	1.6 ±0.28			41.3	24.7	35.2	31.3			na*	na*	3.3373e-05	0.00212756
TNK2	2.88 ±0.39	1.99 ±0.25*					27.6	18.5					0.00104629	na*
YES1	3.79 ±0.74	4.19 ±0.91	1.42 ±0.08	1.48 ±0.04		0.67 ±0.15	63.7	66.6	73.5	63.7		41.8	0.00307498	0.00406277	8.95186e-05	8.3874e-06		0.00467372
ZAK	2.17 ±0.41	4.18 ±0.27	3.93 ±0.59	1.99 ±0.11	4.03 ±0.58	1.75 ±0.36	5.5	44.4	53.4	47.7	53	43.5	0.00281921	0.00011899	0.00139483	7.40341e-05	0.00121157	0.00355314
non-Kinases
ABCB10					0.54 ±0.26						14.4						0.0363909
HSPA1A	0.91 ±0.27						43.2						0.0104465
HSPA8	1.08 ±0.43						52.9						0.0222091
NUDT5	1.2 ±0.44						31.9						0.017895
RETSAT				3.07 ±0.21						33.3						0.00012615
SDR39U1		2.26 ±0.41*	2.68 ±0.35		1.31 ±0.15			35.5	61.1		23.2			na*	0.000892115		0.000605901
TEX264		1.87 ±0.51	2.44 ±0.25	1.86 ±0.31	2.09 ±0.28	0.67 ±0.1		64.5	64.5	48.2	64.9	36.4		0.0078339	0.000448577	0.00185074	0.00104238	0.00141885
YWHAE	0.99 ±0.3		0.8 ±0.41			0.36 ±0.16	47.1		63.5			27.5	0.0106169		0.0438802			0.0289697
YWHAG			0.87 ±0.3		0.58 ±0.22				53.4		53				0.0147548	na*	0.0206764

## Sheet: Titration Probes 3, 4
	Competitor Nr and concentration				*: Protein hit could not be quantified in one of the four quadruplicate experiments
	Average log2 H/L ratios with standard deviations				**: One outliying log2 H/L ratio value raised the p-value over the <0.05 threshold
	Heat Map: Combined sequence coverage from each quadruplicate experiment				p-Values calculated from the four log2 H/L ratios of a quadruplicate experiment according to Student´s T-Test
Kinase Inhibitor Titration							Seq. Coverage %						p-Values
Gene names	1 50 µM	4 50 µM	6 50 µM	7 50 µM	8 50 µM	5 50 µM	1 50 µM	4 50 µM	6 50 µM	7 50 µM	8 50 µM	5 50 µM	1 50 µM	4 50 µM	6 50 µM	7 50 µM	8 50 µM	5 50 µM
ABL1	3.06 ±0.61	2.8 ±0.86	3.1 ±0.61	3.15 ±0.95	2.56 ±0.6	1.28 ±0.56	45.5	42.9	43.5	39.8	33.8	47.4	0.0107258	0.0110115	0.00308176	0.0025281303P6:P325235549	0.00512801	0.0281462
ABL2	2.98 ±0.91	3.17 ±0.23	3.24 ±0.62	3.3 ±0.61	2.68 ±0.54	2.44 ±0.63	53.4	51	50.4	42.3	48.6	60.3	0.00321402	0.000155519	0.00282998	0.0103824	0.00335924	0.0066906
CSK	2.16 ±1.12	2.16 ±1.12	1.39 ±0.63	3.94 ±0.68	3.14 ±0.83	1.21 ±0.46	84.2	84.2	87.1	82.2	84.9	86.4	0.0129014	0.0440535	0.0315618	0.00207205	0.00723219	0.0202717
DDR2	2.5 ±0.64	2.01 ±0.71	2.83 ±0.51	2.74 ±0.26	2.33 ±0.3	1.2 ±0.65	27.6	33	28.7	29	29	37.5	0.00664908	0.016357	0.00232947	0.000346123	0.000854556	0.048851
EPHA2	2.64 ±0.29	2.84 ±0.22	2.71 ±0.31	3.29 ±0.44	2.78 ±0.75	1.4 ±0.66	44.2	46.5	51.4	47.4	52.6	63.2	0.000570368	0.000201744	0.000607469	0.00101571	0.0075552	0.0355001
EPHA5	2.85 ±0.45	3.24 ±0.53	3.33 ±0.26	2.92 ±0.32	2.74 ±0.85	1.97 ±0.64	32.8	29.7	32	39.2	39	50.6	0.00159007	0.00175023	0.000205824	0.000554798	0.0114432	0.0127847
EPHA7	3.01 ±1.22	3.2 ±0.51	2.92 ±1.01	2.81 ±0.51	1.99 ±0.44	0.68 ±0.42	5.9	4.9	6.8	62.5	59.9	70.6	0.0234629	0.00169211	0.0151822	0.0024256	0.00427522	0.0699432
EPHB2	3.32 ±0.86	3.21 ±0.28	3.29 ±0.2	3.65 ±0.25	3.62 ±0.26	3.41 ±0.42	46	49.7	47.6	49.8	51.5	60.9	0.00682102	0.000283685	9.79568e-05	0.00013225	0.000152293	0.00079176
EPHB4	2.81 ±0.63	2.62 ±0.97	2.82 ±0.42	4.21 ±1.36	3.63 ±0.81	3.18 ±0.17	38.2	32.8	30.9	48.4	45.4	66.9	0.0045815	0.0185641	0.0013608	0.0127752	0.00445394	6.62491e-05
FER				1.64 ±0.51	1.04 ±0.49		not shown	not shown	not shown	65.7	63.1	not shown				0.011204	0.0353634	0.427968
FYN	2.72 ±0.24	2.64 ±0.57	3.14 ±0.35	2.07 ±0.85*			50.7	54.2	54.2	61.5	not shown	not shown	0.000279208	0.00399998	0.000579755	na*
GAK	2.9 ±0.35	2.75 ±0.41	2.72 ±0.36	4.09 ±0.69	3.79 ±0.5	3.2 ±0.24	57.8	55.8	54.9	63.5	64.5	72.7	0.000725261	0.00140456	0.00094351	0.00197963	0.000934601	0.000179784
LYN	3.12 ±0.23	3.01 ±0.29	3.18 ±0.46	3.11 ±0.81	2.28 ±1.02	0.56 ±0.41**	75.8	72.5	74.2	76.6	76.2	85.4	0.000173404	0.000384667	0.00121376	0.00686268	0.0304757	**0.0989651895332812
MAP3K1		1.02 ±0.12*	1.09 ±0.15	2.13 ±0.69	1.6 ±0.86	1.23 ±0.44	not shown	6.7	6.2	13.9	14.3	29.8		na*	na*	0.0128451	0.0481207	0.0166568
MAP4K2				2.36 ±0.55	1.85 ±0.56	0.78 ±0.22	0	0	0	51.8	52.7	63.7				0.00491173	0.0104431	0.00871556
MAP4K5	1.38 ±0.43	1.15 ±0.64*		1.07 ±0.64**	1.09 ±0.28		31.2	25.7		24	20.1		0.0113834	na*		**0.0636402329332337	0.00682579
MAPK11				1.66 ±0.34		0.59 ±0.31	0	0	not shown	33	not shown	62.4				0.00356548		0.0460254
MAPK14	1.84 ±0.31	1.34 ±0.35	0.7 ±0.11	2.62 ±0.58	1.88 ±0.57	0.72 ±0.38	73.1	61.9	68.1	85.3	90.8	93.3	0.00191342	0.00682453	0.00185794	0.00428797	0.0108256	0.0458838
MLTK	2.79 ±0.64	2.2 ±0.78	1.52 ±0.51	3.37 ±0.87	2.94 ±0.68	1.45 ±0.59	64.2	59.6	62.6	49.5	56.8	74.9	0.00484388	0.0163703	0.0144401	0.00673271	0.00485795	0.0240593
PTK2				1.96 ±0.47	1.41 ±0.42		0	0	0	50.5	54.1	not shown				0.0054288	0.01043
PTK2B				1.77 ±0.5	1.29 ±0.49		0	0	not shown	42.2	48.6	not shown				0.00880234	0.0197773
PTK6	1.43 ±0.49	1.19 ±0.91		2.15 ±0.68*			11.3	14	not shown	21.7	not shown	not shown		0.108533		na*
RIPK1				2.06 ±0.44	1.4 ±0.34		0	0	0	52.6	64.4	not shown				0.00382132	0.00559855
RIPK2	3.05 ±0.49	3.2 ±0.5	2.65 ±0.39	3.51 ±1.19	3.16 ±0.81	1.65 ±0.48	70.2	68.1	75	65.4	61.7	84.4	0.0147854	0.00156527	0.00128824	0.0145982	0.00652966	0.00980586
SIK1				1.54 ±0.79			not shown	not shown	not shown	8	not shown	not shown				**0.102708383711548
SRC	2.41 ±0.34	2.66 ±0.73	2.82 ±0.59	2.62 ±0.57	2.02 ±0.9		58.5	57.2	60.7	58.7	62.4	80.8	0.00166137	0.00817455	0.0036858	0.00411153	0.0303418	0.111901
TEC	1.71 ±0.22	1.01 ±0.2	0.77 ±0.14*				24.9	27.4	26.1	not shown	not shown	not shown	0.000865995	0.00340468	na*
TNK1				2.25 ±0.28*	1.67 ±0.16*	0.72 ±0.33	0	0	0	41.3	31	57				na*	na	0.0329437
TNK2	2.88 ±0.39	2.32 ±0.33*	2.39 ±0.41*	1.99 ±0.25*	1.68 ±0.2	0.82 ±0.34	27.6	30.2	21.4	18.5	19.7	41.5	0.00104629	na*	na*	na*	0.000674775	0.0245294
YES1	3.79 ±0.74	3.4 ±0.34	3.83 ±0.44	4.19 ±0.91	3.18 ±1.09	1.17 ±0.35	63.7	67.7	63.1	66.6	68.8	73.5	0.00307498	0.000409934	0.000625838	0.00406277	0.0150834	0.0104392
ZAK	2.17 ±0.41	2.03 ±0.9	1.25 ±0.46	4.18 ±0.27	3.72 ±0.48	1.7 ±0.57	50.5	51	53	44.4	54.9	62.6	0.00281921	0.029766	0.0182409	0.00011899	0.00090851	0.0142543
